# Supplementary material for: I-Cubid: a nonlinear cubic graph-based approach to visualize and in-depth browse Flickr image results
Source: PeerJ journal article supplement (doi:10.7717/peerj-cs.1476), 2023-08-10
Supplement: Appendix.pdf [file Appendix.pdf]

Table 1: User evaluation consent form.

|                                                                                                                                                                   |
|-------------------------------------------------------------------------------------------------------------------------------------------------------------------|
| <input type="checkbox"/> I understand that this evaluation is used for purely research purposes.                                                                  |
| <input type="checkbox"/> I understand that my participation is voluntarily and I Can withdraw if unwilling.                                                       |
| <input type="checkbox"/> I understand that my personal information such as name will be kept private.                                                             |
| <input type="checkbox"/> I understand that by writing my name in evaluation demographic form I give my consent to carry out I-Cuboid research evaluation process. |

## Appendix A. User Consent, Demography, Evaluation Tasks, Raw SUS and QUIS Scores

Table 2: Required users' demographic details.

| #  | Age (Years) | Gender (M/F) | Occupation            | Image Search Activity Time per Week | Image Search Experience (Years) | Preferred Image Search Tool | Topic |
|----|-------------|--------------|-----------------------|-------------------------------------|---------------------------------|-----------------------------|-------|
| 1  | 27          | F            | PhD Student + Teacher | Less than 1H                        | 15                              | Google, Facebook            | 3     |
| 2  | 26          | F            | MPhil Student         | More than 9H                        | 10                              | Google, Instagram, Facebook | 2     |
| 3  | 25          | F            | MPhil Student         | More than 9H                        | 15                              | Google, Bing, PhotoBucket   | 2     |
| 4  | 25          | F            | Student + Housewife   | Less than 1H                        | 8                               | Google                      | 4     |
| 5  | 45          | M            | Govt. Servant         | Less than 1H                        | 10                              | Google                      | 2     |
| 6  | 43          | F            | Housewife             | Less than 1H                        | Nil                             | Google                      | 3     |
| 7  | 23          | M            | Under-Grad Student    | Less than 1H                        | 4                               | Google                      | 4     |
| 8  | 21          | F            | Under-Grad Student    | 1-3H                                | 5                               | Google, Instagram           | 1     |
| 9  | 22          | F            | Under-Grad Student    | More than 9H                        | 6                               | Google                      | 1     |
| 10 | 23          | M            | Under-Grad Student    | Less than 1H                        | 7                               | Google                      | 2     |
| 11 | 32          | M            | IT Support            | Less than 1H                        | 5                               | Flicker                     | 3     |
| 12 | 27          | M            | App Developer         | 1-3H                                | 10                              | Google, Bing                | 4     |
| 13 | 32          | F            | Home Tutor            | 1-3H                                | 15                              | Google                      | 1     |
| 14 | 28          | M            | Researcher            | 1-3H                                | 5                               | Google                      | 4     |
| 15 | 30          | M            | Software Developer    | None                                | Nil                             | Personal Photo Folder       | 3     |
| 16 | 26          | M            | Software Engineer     | 1-3H                                | 4                               | Google                      | 2     |

Table 3: Evaluation topics and tasks detail.

| Type          | Topic                                              | Goldfish in Aquarium                                                                                                                                          | Bullet Trains in Japan                             | Fighter Aircraft in Pakistan                                                                                                                                     | Indian Tiger |
|---------------|----------------------------------------------------|---------------------------------------------------------------------------------------------------------------------------------------------------------------|----------------------------------------------------|------------------------------------------------------------------------------------------------------------------------------------------------------------------|--------------|
| Guide Task    | Step                                               | Grid-based Presentation                                                                                                                                       |                                                    | Cube-based Presentation                                                                                                                                          |              |
|               | 1                                                  | Input query {topic}                                                                                                                                           |                                                    | Input query {topic}                                                                                                                                              |              |
|               | 2                                                  | Select an image in seventh row and third column on the grid.                                                                                                  |                                                    | Select second plane from the cube.                                                                                                                               |              |
|               | 3                                                  | Select image in third row and fourth column of second plane.                                                                                                  |                                                    | Select image in third row and fourth column of second plane.                                                                                                     |              |
|               | 4                                                  | View details of the selected image.                                                                                                                           |                                                    | View details of the selected image.                                                                                                                              |              |
|               | 5                                                  | Download the selected image on your computer.                                                                                                                 |                                                    | Download the selected image on your computer.                                                                                                                    |              |
|               | 6                                                  | View the neighbors (left, right, top, and bottom) of the selected image.                                                                                      |                                                    | View the neighbors (left, right, top, bottom, next, previous) of the selected image.                                                                             |              |
|               | 7                                                  | On the second page, select image in thirteenth row and sixth column.                                                                                          |                                                    | Select any image from the neighbor images.                                                                                                                       |              |
|               | 8                                                  | View details of the selected image.                                                                                                                           |                                                    | View details of the selected image.                                                                                                                              |              |
| Unguided Task | 9                                                  | Download the selected image on your computer.                                                                                                                 |                                                    | Download the selected image on your computer.                                                                                                                    |              |
|               | 1                                                  | Search {topic}                                                                                                                                                |                                                    | Search {topic}                                                                                                                                                   |              |
|               | 2                                                  | Identify a pair of entities related to {topic} view its details, and download it on your computer from the first page.                                        |                                                    | Identify pair of entities related to {topic} by exploring all the planes of the cube, view the details of the identified image, and download it on your image.   |              |
|               | 3                                                  | Explore the neighbor images of the selected image.                                                                                                            |                                                    | Explore the neighbor images of the selected image.                                                                                                               |              |
|               | 4                                                  | Select the next page by clicking the next button.                                                                                                             |                                                    | Select the next cube by clicking the next button.                                                                                                                |              |
|               | 5                                                  | Identify an image containing a pair entity related to {topic} with white background, view its details, and download it on your computer from the second page. |                                                    | Identify an image containing a pair entity related to {topic} with white background, view the details of the identified image, and download it on your computer. |              |
| 6             | Explore the neighbor images of the selected image. |                                                                                                                                                               | Explore the neighbor images of the selected image. |                                                                                                                                                                  |              |

Table 4: Grid presentation system usability results.

| User/Q.No     | Q1 | Q2 | Q3 | Q4 | Q5 | Q6 | Q7 | Q8 | Q9 | Q10 | Sum | Score Value |
|---------------|----|----|----|----|----|----|----|----|----|-----|-----|-------------|
| 1             | 4  | 2  | 4  | 2  | 4  | 2  | 4  | 2  | 4  | 3   | 29  | 72.5        |
| 2             | 5  | 2  |    | 3  | 5  | 3  | 5  | 1  | 3  | 1   | 28  | 70          |
| 3             | 1  | 2  | 3  | 2  | 3  | 3  | 1  | 1  | 4  | 3   | 21  | 52.5        |
| 4             | 3  | 3  | 3  | 2  | 3  | 2  | 2  | 2  | 4  | 2   | 24  | 60          |
| 5             | 3  | 2  | 4  | 1  | 2  | 2  | 4  | 2  | 5  | 1   | 30  | 75          |
| 6             | 4  | 1  | 4  | 3  | 5  | 1  | 5  | 1  | 5  | 4   | 33  | 82.5        |
| 7             | 5  | 1  | 5  | 1  | 5  | 1  | 5  | 1  | 5  | 1   | 40  | 100         |
| 8             | 5  | 1  | 5  | 1  | 4  | 1  | 5  | 1  | 4  | 1   | 38  | 95          |
| 9             | 4  | 1  | 5  | 3  | 4  | 2  | 5  | 1  | 5  | 2   | 34  | 85          |
| 10            | 4  | 2  | 5  | 1  | 4  | 3  | 4  | 2  | 5  | 1   | 33  | 82.5        |
| 11            | 4  | 2  | 1  | 2  | 2  | 2  | 1  | 2  | 4  | 2   | 22  | 55          |
| 12            | 5  | 4  | 5  | 5  | 4  | 3  | 3  | 1  | 5  | 1   | 28  | 70          |
| 13            | 4  | 1  | 5  | 2  | 5  | 2  | 5  | 1  | 4  | 1   | 36  | 90          |
| 14            | 4  | 1  | 5  | 1  | 5  | 1  | 5  | 1  | 5  | 1   | 39  | 97.5        |
| 15            | 4  | 3  | 4  | 1  | 4  | 1  | 3  | 2  | 4  | 2   | 30  | 75          |
| 16            | 5  | 1  | 5  | 1  | 5  | 1  | 5  | 1  | 5  | 1   | 40  | 100         |
| 17            | 5  | 1  | 5  | 1  | 5  | 1  | 5  | 1  | 5  | 2   | 39  | 97.5        |
| 18            | 4  | 1  | 5  | 1  | 5  | 2  | 5  | 1  | 5  | 1   | 38  | 95          |
| Average Score |    |    |    |    |    |    |    |    |    |     |     | 80.8        |

Table 5: Cube presentation system usability scale results.

| User/Q.No     | Q1 | Q2 | Q3 | Q4 | Q5 | Q6 | Q7 | Q8 | Q9 | Q10 | Sum | Score Value |
|---------------|----|----|----|----|----|----|----|----|----|-----|-----|-------------|
| 1             | 4  | 2  | 4  | 2  | 4  | 2  | 4  | 2  | 4  | 3   | 29  | 72.5        |
| 2             | 4  | 3  | 5  | 4  | 4  | 3  | 4  | 2  | 3  | 3   | 25  | 62.5        |
| 3             | 5  | 1  | 1  | 5  | 5  | 1  | 5  | 2  | 5  | 3   | 29  | 72.5        |
| 4             | 3  | 2  | 4  | 2  | 4  | 2  | 4  | 2  | 4  | 2   | 29  | 72.5        |
| 5             | 5  | 1  | 5  | 1  | 5  | 1  | 5  | 1  | 5  | 1   | 40  | 100         |
| 6             | 2  | 4  | 2  | 1  | 2  | 4  | 3  | 2  | 4  | 4   | 18  | 45          |
| 7             | 5  | 1  | 5  | 1  | 5  | 1  | 5  | 1  | 5  | 1   | 40  | 100         |
| 8             | 5  | 1  | 5  | 1  | 5  | 1  | 4  | 1  | 4  | 1   | 38  | 95          |
| 9             | 4  | 5  | 3  | 4  | 3  | 4  | 5  | 2  | 5  | 2   | 23  | 57.5        |
| 10            | 5  |    | 5  | 2  | 4  | 3  | 4  | 3  | 5  | 2   | 33  | 82.5        |
| 11            | 5  | 1  | 5  | 3  | 5  | 1  | 4  | 1  | 5  | 2   | 36  | 90          |
| 12            | 5  | 4  | 4  | 4  | 5  | 3  | 3  | 3  | 5  | 2   | 26  | 65          |
| 13            | 4  | 3  | 4  | 3  | 2  | 2  | 4  | 4  | 3  | 4   | 21  | 52.5        |
| 14            | 3  | 2  | 3  | 1  | 4  | 1  | 5  | 2  | 4  | 2   | 31  | 77.5        |
| 15            | 4  | 2  | 4  | 2  | 3  | 2  | 3  | 2  | 4  | 2   | 28  | 70          |
| 16            | 5  | 1  | 5  | 1  | 5  | 1  | 5  | 1  | 5  | 1   | 40  | 100         |
| 17            | 5  | 1  | 5  | 2  | 5  | 1  | 5  | 1  | 5  | 1   | 39  | 97.5        |
| 18            | 4  | 1  | 5  | 1  | 5  | 2  | 5  | 1  | 5  | 1   | 38  | 95          |
| Average Score |    |    |    |    |    |    |    |    |    |     |     | 78.2        |

Table 6: Grid presentation questionnaire for user interfaces satisfaction results.

| User/Type   | Overall | Screen | Sys. Info. & Ter. | Learning | Sys. Cap. | Average | Score Value |
|-------------|---------|--------|-------------------|----------|-----------|---------|-------------|
| 1           | 8       | 8      | 8                 | 7.7      | 8         | 7.9     | 88.1        |
| 2           | 8.4     | 8.3    | 7                 | 8.2      | 6         | 7.6     | 84.2        |
| 3           | 5.5     | 3.8    | 4.8               | 4        | 4.4       | 4.5     | 50.1        |
| 4           | 6.7     | 6.3    | 6.7               | 6        | 4.2       | 6.0     | 66.3        |
| 5           | 6.8     | 5.5    | 6.2               | 7.7      | 7.8       | 6.8     | 75.3        |
| 6           | 9       | 8.8    | 9                 | 9        | 9         | 9.0     | 99.6        |
| 7           | 9       | 9      | 9                 | 9        | 9         | 9       | 100         |
| 8           | 8.3     | 9      | 7.3               | 8.8      | 9         | 8.5     | 94.4        |
| 9           | 8.7     | 8      | 5.7               | 8        | 8         | 7.7     | 85.2        |
| 10          | 8.3     | 8.3    | 7.8               | 8.7      | 8.8       | 8.4     | 93.2        |
| 11          | 1.2     | 2.8    | 2.3               | 3.3      | 1         | 2.1     | 23.7        |
| 12          | 7.7     | 6.3    | 8                 | 8.5      | 6         | 7.3     | 81          |
| 13          | 8.7     | 8      | 8                 | 8.5      | 8.3       | 8.3     | 92          |
| 14          | 6.8     | 9      | 9                 | 9        | 9         | 8.6     | 95          |
| 15          | 7       | 7      | 7.5               | 7.3      | 7.4       | 7.3     | 80.56       |
| 16          | 9       | 9      | 8                 | 8        | 8         | 8.4     | 93.3        |
| 17          | 8.8     | 8.5    | 8.8               | 8.8      | 8.8       | 8.8     | 97.2        |
| 18          | 8.5     | 8.8    | 7.75              | 9        | 8.2       | 8.5     | 93.9        |
| Average     | 7.6     | 7.5    | 7.3               | 7.8      | 7.3       | 7.5     | 83.0        |
| Score Value | 84.1    | 83     | 80.8              | 86.1     | 80.8      | 83      | 83.0        |

Table 7: Cube presentation questionnaire for user interface satisfaction results.

| User/Q.No   | Overall | Screen | Sys. Info. & Ter. | Sys. Info. & Ter. | Sys. Cap. | Average | Score Value |
|-------------|---------|--------|-------------------|-------------------|-----------|---------|-------------|
| 1           | 6.8     | 7.3    | 7.0               | 7.5               | 8.0       | 7.3     | 81.3        |
| 2           | 7.4     | 8.0    | 6.3               | 6.8               | 5.4       | 6.8     | 75.3        |
| 3           | 5.5     | 7.3    | 8.3               | 8.0               | 7.6       | 7.3     | 81.6        |
| 4           | 7.2     | 7.5    | 7.6               | 6.8               | 6.0       | 7.0     | 77.8        |
| 5           | 8.5     | 8.5    | 8.2               | 9.0               | 9.0       | 8.6     | 96.0        |
| 6           | 1.3     | 2.3    | 2.3               | 2.0               | 5.8       | 2.7     | 30.4        |
| 7           | 9.0     | 9.0    | 9.0               | 9.0               | 9.0       | 9.0     | 100.0       |
| 8           | 8.7     | 9.0    | 7.6               | 9.0               | 9.0       | 8.7     | 96.1        |
| 9           | 6.0     | 7.7    | 8.5               | 4.0               | 2.0       | 5.6     | 62.6        |
| 10          | 8.3     | 8.3    | 8.2               | 8.5               | 8.4       | 8.3     | 92.6        |
| 11          | 9.0     | 9.0    | 9.0               | 9.0               | 9.0       | 9.0     | 100.0       |
| 12          | 7.3     | 7.3    | 7.7               | 8.0               | 6.8       | 7.4     | 82.2        |
| 13          | 6.7     | 5.0    | 6.0               | 5.2               | 7.0       | 6.0     | 66.3        |
| 14          | 7.0     | 6.7    | 9.0               | 8.8               | 9.0       | 8.1     | 89.8        |
| 15          | 7.7     | 7.3    | 7.3               | 6.7               | 7.2       | 7.2     | 80.2        |
| 16          | 9.0     | 9.0    | 8.0               | 8.0               | 8.0       | 8.4     | 93.3        |
| 17          | 8.8     | 9.0    | 8.8               | 8.7               | 8.8       | 8.8     | 98.0        |
| 18          | 8.5     | 8.8    | 8.0               | 9.0               | 8.2       | 8.5     | 94.3        |
| Average     | 7.4     | 7.6    | 7.6               | 7.4               | 7.5       | 7.5     | 83.2        |
| Score Value | 81.9    | 84.3   | 84.6              | 82.6              | 82.8      | 83.2    | 83.2        |
